# Supplementary material for: 1D porous framework of copper(ii) showing a novel coordination mode of Ni(CN)42−
Source: Royal Society of Chemistry journal article supplement (doi:10.1039/b103823k), 2001-01-01
Supplement: b103823k5.doc [file b103823k5.doc]

**Fig. 5 :** View of the dehydrated polymer down the crystallographic b axis.
