# Supplementary figures and images for: 1D porous framework of copper(ii) showing a novel coordination mode of Ni(CN)42−
Source: Royal Society of Chemistry journal article supplement (doi:10.1039/b103823k), 2001-01-01

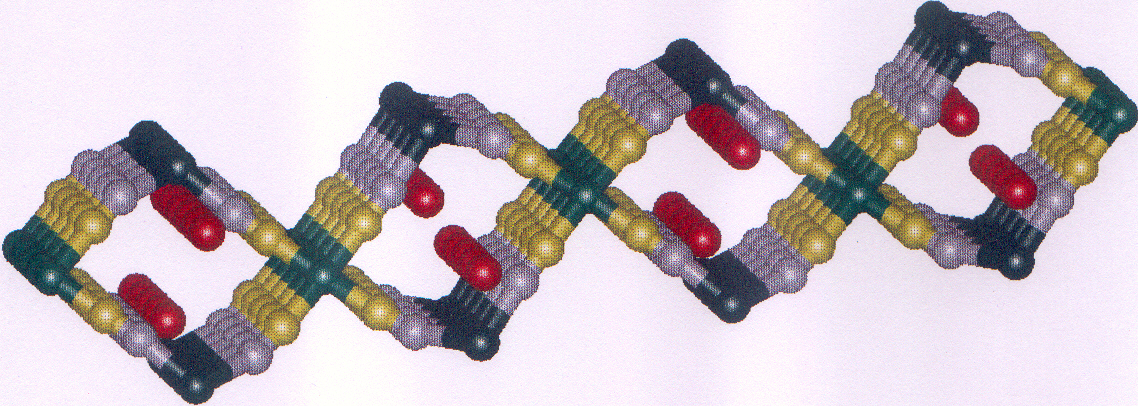


Fig. 7

Supplement: b103823k7.doc [file b103823k7.doc]
